# Supplementary material for: Human oral isolate Lactobacillus fermentum AGR1487 induces a pro-inflammatory response in germ-free rat colons
Source: PubMed Central journal article supplement (PMC4740858; doi:10.1038/srep20318), 2016-02-04

**Human oral isolate *Lactobacillus fermentum* AGR1487 induces a pro-inflammatory response in germ-free rat colons**

Rachel C. Anderson, Dulantha Ulluwishewa, Wayne Young, Leigh J. Ryan, Gemma Henderson, Marjolein Meijerink, Eva Maier, Jerry M. Wells & Nicole C. Roy

**SUPPLEMENTARY TABLE S1 - Genes differentially expressed in the colon of rats mono-associated with *L. fermentum* AGR1485 versus *L. fermentum* AGR1487**

| Gene Name | Agilent Probe ID | Systematic Name    | log Fold Change | Average expression | adj.P.Val   | Description                                                                                                                                            |
|-----------|------------------|--------------------|-----------------|--------------------|-------------|--------------------------------------------------------------------------------------------------------------------------------------------------------|
| Pyy       | A_44_P116446     | NM_001034080       | 1.3132484       | 13.34915368        | 6.15E-06    | peptide YY precursor [Source:RefSeq peptide;Acc:NP_001029252]                                                                                          |
| Cck       | A_44_P119019     | NM_012829          | 1.53014547      | 9.656087548        | 1.24E-05    | Cholecystokinin Cholecystokinin-39 Cholecystokinin-33 Cholecystokinin-22 Cholecystokinin-12 Cholecystokinin-8 [Source:UniProtKB/Swiss-Prot;Acc:P01355] |
| Tfrc      | A_44_P214811     | NM_022712          | 0.64889699      | 11.82287026        | 6.85E-05    | transferrin receptor protein 1 [Source:RefSeq peptide;Acc:NP_073203]                                                                                   |
| Pappa     | A_43_P22638      | NM_001107939       | -0.7778101      | 7.6707132          | 0.00015113  | pappalysin-1 [Source:RefSeq peptide;Acc:NP_001101409]                                                                                                  |
| Arg1      | A_42_P758222     | NM_017134          | 0.89613947      | 9.638474497        | 0.000163653 | Arginase-1 [Source:UniProtKB/Swiss-Prot;Acc:P07824]                                                                                                    |
| Col4a5    | A_44_P105448     | ENSRNOT00000025677 | -0.7661855      | 8.870191008        | 0.000223523 | Unknown                                                                                                                                                |
| Mettl20   | A_44_P273885     | NM_198772          | -0.6066434      | 8.931887671        | 0.000252219 | Methyltransferase-like protein 20 [Source:UniProtKB/Swiss-Prot;Acc:Q6P7Q0]                                                                             |
| Slc39a8   | A_43_P18495      | NM_0010111952      | -0.6354258      | 9.180128337        | 0.000472113 | Zinc transporter ZIP8 [Source:UniProtKB/Swiss-Prot;Acc:Q5FVQ0]                                                                                         |
| Krt23     | A_44_P1043278    | TC590266           | 0.68482994      | 9.23241382         | 0.000505858 | keratin, type I cytoskeletal 23 [Source:RefSeq peptide;Acc:NP_001008753]                                                                               |
| Pum2      | A_44_P1042901    | NM_001106715       | -0.69957        | 9.820383795        | 0.000579911 | pumilio homolog 2 [Source:RefSeq peptide;Acc:NP_001100185]                                                                                             |
| Chrd      | A_44_P345319     | NM_057134          | -0.688721       | 9.226483843        | 0.000603483 | Chordin [Source:UniProtKB/Swiss-Prot;Acc:Q63148]                                                                                                       |
| Erlin2    | A_44_P960610     | TC594625           | -0.6245076      | 12.25380353        | 0.00069046  | Erlin-2 [Source:UniProtKB/Swiss-Prot;Acc:B5DEH2]                                                                                                       |
| Agap1     | A_43_P10107      | NM_001108230       | -0.738018       | 12.45751074        | 0.000739626 | arf-GAP with GTPase, ANK repeat and PH domain-containing protein 1 [Source:RefSeq peptide;Acc:NP_001101700]                                            |
| Dyrk2     | A_44_P411808     | NM_001108100       | -0.6872124      | 11.48833158        | 0.001131427 | dual specificity tyrosine-phosphorylation-regulated kinase 2 [Source:RefSeq peptide;Acc:NP_001101570]                                                  |
| COX1      | A_44_P183948     | ENSRNOT00000043693 | 0.63358725      | 14.69525056        | 0.001321276 | cytochrome c oxidase subunit I (mitochondrion) [Source:RefSeq peptide;Acc:YP_665631]                                                                   |
| Mat2a     | A_44_P118993     | NM_134351          | -0.6723113      | 8.767680343        | 0.001323404 | S-adenosylmethionine synthase isoform type-2 [Source:RefSeq peptide;Acc:NP_599178]                                                                     |
| Trak2     | A_44_P408887     | NM_133560          | -0.8142061      | 10.96611248        | 0.001441981 | Trafficking kinesin-binding protein 2 [Source:UniProtKB/Swiss-Prot;Acc:Q8R2H7]                                                                         |

|          |               |                    |            |             |             |                                                                                                 |
|----------|---------------|--------------------|------------|-------------|-------------|-------------------------------------------------------------------------------------------------|
| Mmp14    | A_43_P14927   | NM_031056          | -0.9421772 | 12.79576645 | 0.001538546 | Matrix metalloproteinase-14 [Source:UniProtKB/Swiss-Prot;Acc:Q10739]                            |
| Cyr61    | A_42_P750683  | NM_031327          | 1.01238313 | 10.10078298 | 0.001587414 | protein CYR61 precursor [Source:RefSeq peptide;Acc:NP_112617]                                   |
| Dpt      | A_44_P180259  | NM_001105965       | -0.7300768 | 11.24557751 | 0.001856786 | dermatopontin precursor [Source:RefSeq peptide;Acc:NP_001099435]                                |
| Gcg      | A_44_P315672  | NM_012707          | 0.92275337 | 13.91582294 | 0.002005436 | glucagon preproprotein [Source:RefSeq peptide;Acc:NP_036839]                                    |
| Tmed9    | A_44_P316507  | NM_001009703       | -0.6923164 | 13.88545014 | 0.002190994 | Transmembrane emp24 domain-containing protein 9 [Source:UniProtKB/Swiss-Prot;Acc:Q5I0E7]        |
| Lamc1    | A_44_P370044  | NM_053966          | -0.5847798 | 7.566080452 | 0.00219839  | laminin, gamma 1 precursor [Source:RefSeq peptide;Acc:NP_446418]                                |
| Map3k1   | A_42_P823894  | NM_053887          | -0.657362  | 8.783963992 | 0.002239734 | mitogen-activated protein kinase kinase kinase 1 [Source:RefSeq peptide;Acc:NP_446339]          |
| Sel1l3   | A_43_P17569   | XM_341223          | -0.6296491 | 12.26811178 | 0.002253123 | Protein Sel1l3 [Source:UniProtKB/TrEMBL;Acc:D3ZIJ4]                                             |
| Unknown  | A_44_P698627  | ENSRNOT00000042148 | -0.6107699 | 10.55413705 | 0.002357382 | Unknown                                                                                         |
| 2210407C | A_44_P375623  | NM_001109638       | 0.60418731 | 9.734829537 | 0.002503283 | RIKEN cDNA 2210407C18 gene [Source:MGI Symbol;Acc:MGI:1925604]                                  |
| 18Rik    |               |                    |            |             |             |                                                                                                 |
| Otud7b   | A_44_P914961  | NM_001107697       | -1.1844598 | 7.302714833 | 0.002510477 | OTU domain-containing protein 7B [Source:RefSeq peptide;Acc:NP_001101167]                       |
| Tnrc6b   | A_44_P484793  | NM_138845          | -0.7769571 | 11.63158224 | 0.0025942   | trinucleotide repeat-containing gene 6B protein [Source:RefSeq peptide;Acc:NP_620200]           |
| Chd7     | A_42_P690223  | ENSRNOT00000008901 | -0.8396968 | 11.7282168  | 0.002816633 | chromodomain helicase DNA binding protein 7 [Source:MGI Symbol;Acc:MGI:2444748]                 |
| Plekho2  | A_44_P530187  | ENSRNOT00000042633 | 0.67052584 | 9.604009175 | 0.002938575 | Unknown                                                                                         |
| Slc28a2  | A_44_P523000  | XM_001080361       | -0.6097043 | 10.0883756  | 0.003054584 | sodium/nucleoside cotransporter 2 [Source:RefSeq peptide;Acc:NP_113852]                         |
| Igf2r    | A_44_P1003212 | NM_012756          | -0.5930957 | 12.79123785 | 0.003123251 | cation-independent mannose-6-phosphate receptor precursor [Source:RefSeq peptide;Acc:NP_036888] |
| Mt2A     | A_42_P567267  | NM_001137564       | 1.09889944 | 11.7691076  | 0.003151135 | Metallothionein-2 [Source:UniProtKB/Swiss-Prot;Acc:P04355]                                      |
| Zfp191   | A_44_P301633  | NM_182955          | -0.659265  | 11.20369461 | 0.003352974 | Zinc finger protein 24 [Source:UniProtKB/Swiss-Prot;Acc:Q7TNK3]                                 |

|            |               |                    |            |             |             |                                                                                                        |
|------------|---------------|--------------------|------------|-------------|-------------|--------------------------------------------------------------------------------------------------------|
| St6galnac2 | A_44_P497302  | NM_001031652       | -0.6205084 | 8.509549403 | 0.003823948 | alpha-N-acetylgalactosaminide alpha-2,6-sialyltransferase 2 [Source:RefSeq peptide;Acc:NP_001026822]   |
| Unknown    | A_44_P366118  | ENSRNOT00000050777 | -0.6582971 | 11.68653514 | 0.003878182 | Unknown                                                                                                |
| Ppp1r27    | A_44_P459858  | NM_001105858       | 0.63979713 | 7.848837568 | 0.004434882 | dysferlin-interacting protein 1 [Source:RefSeq peptide;Acc:NP_001099328]                               |
| Rnf187     | A_44_P477268  | NM_001164264       | 0.68226975 | 9.949953381 | 0.00455782  | E3 ubiquitin-protein ligase RNF187 [Source:RefSeq peptide;Acc:NP_001157736]                            |
| Nts        | A_44_P1030165 | NM_001102381       | 1.71687516 | 6.960567984 | 0.004593693 | neurotensin/neuromedin N precursor [Source:RefSeq peptide;Acc:NP_001095851]                            |
| Camk2n1    | A_44_P493606  | NM_173337          | -0.8432615 | 11.85400762 | 0.004754506 | Calcium/calmodulin-dependent protein kinase II inhibitor 1 [Source:UniProtKB/Swiss-Prot;Acc:Q9JI15]    |
| Enpp1      | A_43_P12841   | NM_053535          | -0.8096543 | 11.19133793 | 0.004783799 | ectonucleotide pyrophosphatase/phosphodiesterase family member 1 [Source:RefSeq peptide;Acc:NP_445987] |
| Luc7l3     | A_44_P424633  | NM_001108291       | -0.6928149 | 8.619701732 | 0.004807296 | luc7-like protein 3 [Source:RefSeq peptide;Acc:NP_001101761]                                           |
| Aldh1a1    | A_44_P365286  | NM_022407          | 0.74045003 | 10.37495918 | 0.004833248 | Retinal dehydrogenase 1 [Source:UniProtKB/Swiss-Prot;Acc:P51647]                                       |
| Chtf8      | A_44_P727274  | NM_001194951       | 0.68312237 | 10.86914438 | 0.005173377 | Chromosome transmission fidelity protein 8 homolog isoform 2 [Source:UniProtKB/Swiss-Prot;Acc:B2RYL1]  |
| Tcf4       | A_42_P524370  | NM_053369          | -0.6942909 | 11.45223176 | 0.005289868 | transcription factor 4 [Source:RefSeq peptide;Acc:NP_445821]                                           |
| Atp2b1     | A_43_P12761   | NM_053311          | -1.2505486 | 11.58240691 | 0.005323548 | Plasma membrane calcium-transporting ATPase 1 [Source:UniProtKB/Swiss-Prot;Acc:P11505]                 |
| Srp72      | A_44_P1018684 | NM_001170601       | -0.7189785 | 10.42934074 | 0.005409744 | signal recognition particle 72 kDa protein [Source:RefSeq peptide;Acc:NP_001164072]                    |
| Irf2bpl    | A_42_P491707  | FQ226403           | -0.6329773 | 12.12360416 | 0.005427511 | Interferon regulatory factor 2-binding protein-like [Source:UniProtKB/Swiss-Prot;Acc:Q5EIC4]           |
| Napsa      | A_42_P738549  | NM_031670          | -1.9369111 | 10.46624405 | 0.005536791 | napsin A aspartic peptidase precursor [Source:RefSeq peptide;Acc:NP_113858]                            |
| Hyou1      | A_43_P11333   | NM_138867          | -0.8223274 | 13.02055886 | 0.005609854 | hypoxia up-regulated protein 1 precursor [Source:RefSeq peptide;Acc:NP_620222]                         |
| Man2a1     | A_44_P1038694 | NM_012979          | -0.7982794 | 12.82476989 | 0.005633241 | alpha-mannosidase 2 [Source:RefSeq peptide;Acc:NP_037111]                                              |
| Mef2bnb    | A_44_P468661  | NM_001145726       | 0.66405258 | 9.48509582  | 0.005883211 | uncharacterized protein LOC688966 [Source:RefSeq peptide;Acc:NP_001139198]                             |
| Unknown    | A_44_P177801  | NM_022397          | -0.6247571 | 12.14096855 | 0.005953158 | Unknown                                                                                                |

|          |              |                    |            |             |             |                                                                                                        |
|----------|--------------|--------------------|------------|-------------|-------------|--------------------------------------------------------------------------------------------------------|
| Igfbp3   | A_42_P627998 | NM_012588          | -1.103182  | 14.5401056  | 0.006007802 | insulin-like growth factor-binding protein 3 precursor [Source:RefSeq peptide;Acc:NP_036720]           |
| Unknown  | A_44_P389664 | ENSRNOT00000058640 | -0.6806511 | 12.46474173 | 0.006269316 | Ac2-008 [Source:UniProtKB/TrEMBL;Acc:Q7TPK9]                                                           |
| Akap13   | A_44_P210440 | NM_001106271       | -0.7119876 | 12.04572814 | 0.006315607 | A-kinase anchor protein 13 [Source:RefSeq peptide;Acc:NP_001099741]                                    |
| Fam43a   | A_44_P356876 | NM_001039002       | -0.6052845 | 7.222359874 | 0.007292567 | protein FAM43A [Source:RefSeq peptide;Acc:NP_001034091]                                                |
| Cyp4v3   | A_44_P297252 | NM_001135600       | -0.8064656 | 7.27739549  | 0.007323899 | Cytochrome P450 4V2 [Source:UniProtKB/Swiss-Prot;Acc:A2RRT9]                                           |
| Tspan12  | A_42_P665848 | NM_001015026       | -0.5982725 | 8.993980367 | 0.0077037   | Tetraspanin-12 [Source:UniProtKB/Swiss-Prot;Acc:Q569A2]                                                |
| Unknown  | A_44_P898364 | ENSRNOT00000033720 | 0.69364771 | 8.949627744 | 0.007881846 | Uncharacterized protein [Source:UniProtKB/TrEMBL;Acc:F1LXN7]                                           |
| Eif4ebp2 | A_44_P757980 | NM_001033069       | -0.9809898 | 11.56735852 | 0.008031728 | eukaryotic translation initiation factor 4E-binding protein 2 [Source:RefSeq peptide;Acc:NP_001028241] |
| Adh7     | A_44_P166161 | NM_134329          | 0.71149299 | 7.543402392 | 0.008308359 | alcohol dehydrogenase class 4 mu/sigma chain [Source:RefSeq peptide;Acc:NP_599156]                     |
| Elovl6   | A_44_P111489 | TC614535           | -0.6129884 | 9.631538258 | 0.008579145 | elongation of very long chain fatty acids protein 6 [Source:RefSeq peptide;Acc:NP_599210]              |
| Egfr     | A_44_P346408 | NM_031507          | -0.6210015 | 9.090549677 | 0.008586236 | epidermal growth factor receptor precursor [Source:RefSeq peptide;Acc:NP_113695]                       |
| Eif4e3   | A_44_P466595 | NM_001106612       | -0.653951  | 9.017503424 | 0.008921299 | eukaryotic translation initiation factor 4E type 3 [Source:RefSeq peptide;Acc:NP_001100082]            |
| Rtn4rl2  | A_44_P203173 | NM_181380          | 0.95656756 | 11.56492693 | 0.008942998 | Reticulon-4 receptor-like 2 [Source:UniProtKB/Swiss-Prot;Acc:Q80WD1]                                   |
| Myocd    | A_44_P479899 | NM_182667          | -0.6127353 | 7.732218582 | 0.008955701 | Myocardin [Source:UniProtKB/Swiss-Prot;Acc:Q8R5I7]                                                     |
| Unknown  | A_44_P288536 | NM_001108548       | 0.61398757 | 10.51205816 | 0.009901751 | Unknown                                                                                                |

---

**Supplementary Figure S1.** Cerebral Network view of significantly over-represented gene ontology biological processes, KEGG pathways and Reactome pathways among differentially expressed genes in the colon of germ-free rats mono-associated with AGR1485 or AGR1487. Network shows processes and pathways linked by shared genes, arranged according to cellular localization.

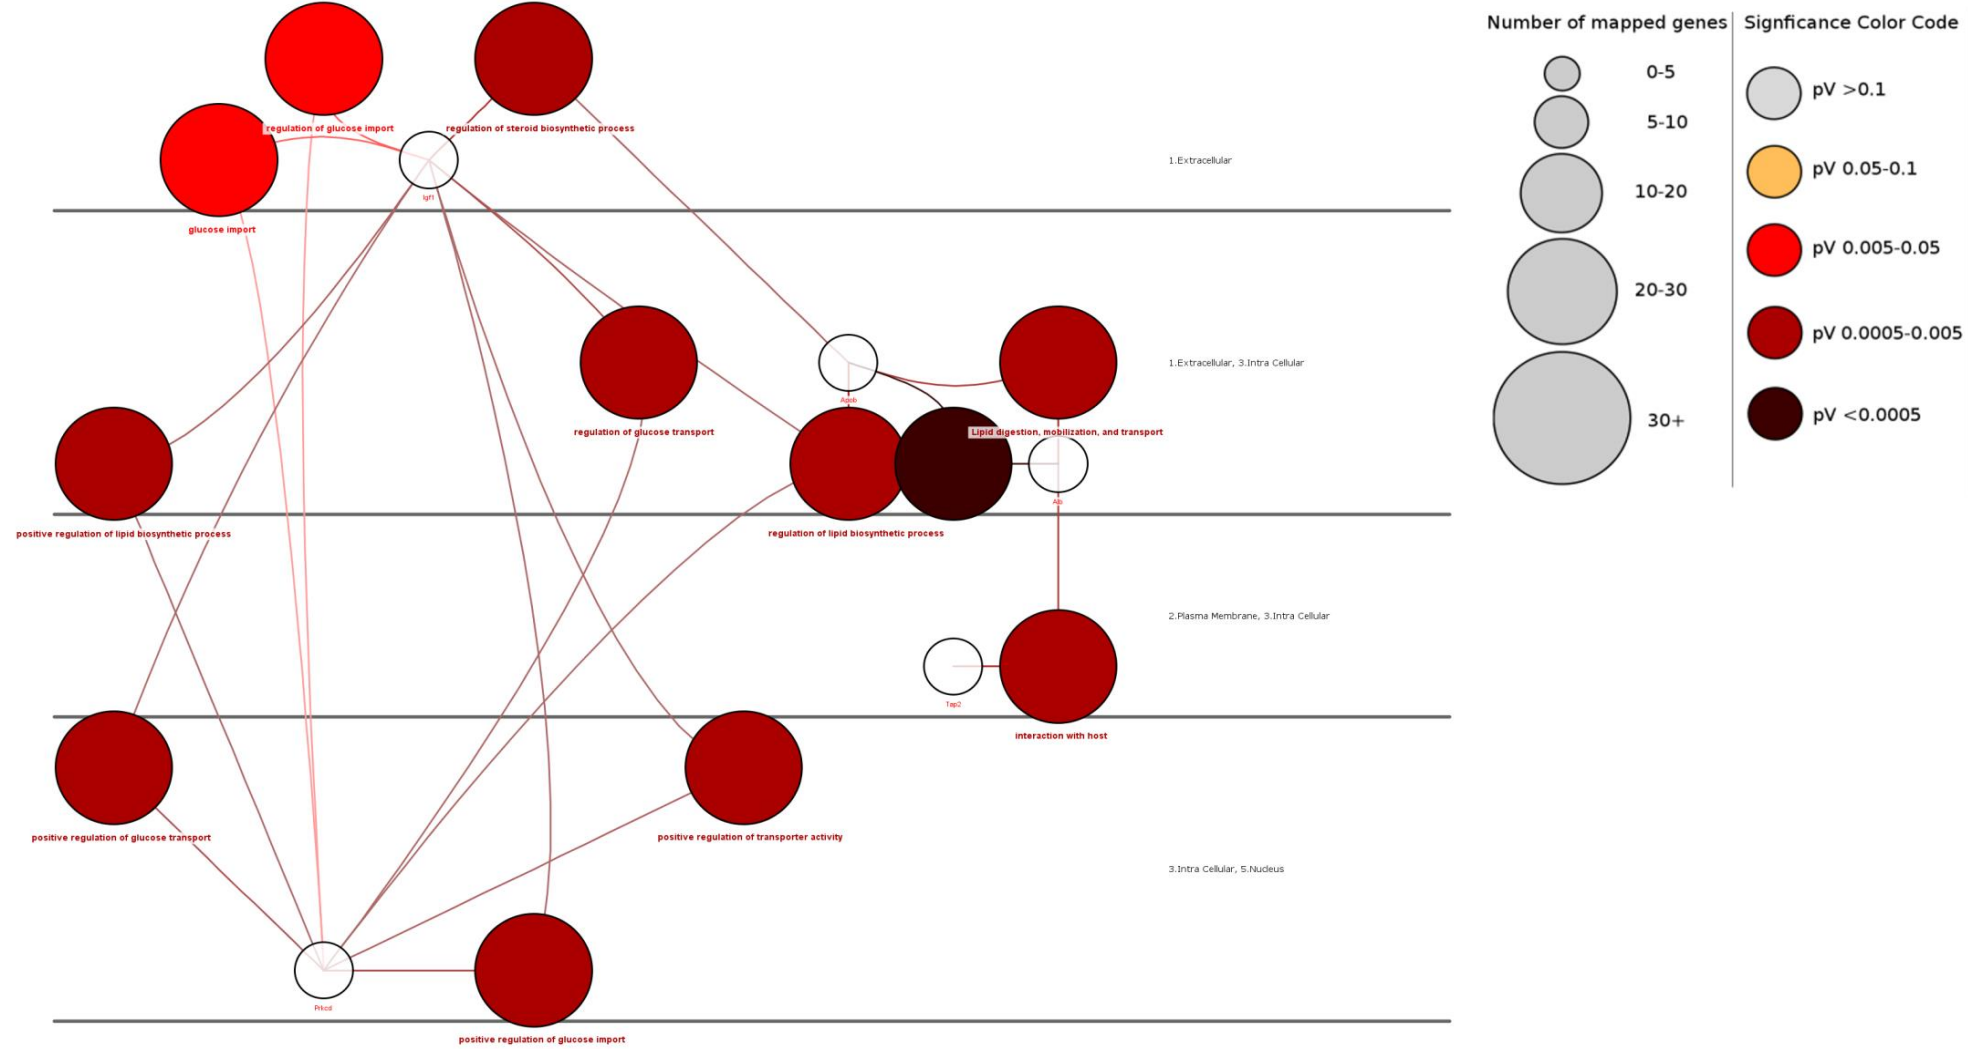

Supplement: srep20318-s1.pdf [file srep20318-s1.pdf]
